# Supplementary material
Source: publisher figshare collection journal article supplement (https://frontiersin.figshare.com/ndownloader/files/34427501)
Supplement: Supplementary file [file 34427501]

**Supplementary Table 1.** Definition of the regions of interests for the region of interest analysis. The areas correspond to the significant peaks from the main ALE analysis published by Planton et al. (2013). In the case of no corresponding AAL region or a selectable region in the WFU PickAtlas, we defined the respective ROI as a sphere of 10mm around the peak coordinate (Planton et al., 2013; Table 2). As there is an intersection of 32 voxels between the stated definitions of area (2) and (3), the size of the aggregate mask used for the ROI-analysis is smaller than the sum of the sizes of the listed areas.

| Area                                                                   | Definition                                                 | Voxel count | Volume (mm <sup>3</sup> ) |
|------------------------------------------------------------------------|------------------------------------------------------------|-------------|---------------------------|
| (1) Gyrus frontalis medius - left                                      | Sphere with r = 10mm around [-22, -8, 54]                  | 515         | 4120                      |
| <b>(2) Primary motor cortex &amp; Somatosensory cortex - left</b>      | Brodmann Areas 1 -4 – according to the WFU PickAtlas       | 5139        | 41110                     |
| (3) Superior parietal lobule - left                                    | AAL label “Parietal_Sup_L”                                 | 2065        | 16520                     |
| <b>(4) Supplementary and pre-supplementary motor area - left</b>       | AAL label “Supp_Motor_Area_L”                              | 1808        | 14460                     |
| (5) Anterior cerebellar lobe - right                                   | anterior cerebellar lobe – according to the WFU PickAtlas  | 3530        | 28240                     |
| (6) Thalamus - left                                                    | AAL label “Thalamus_L”                                     | 1009        | 8072                      |
| <b>(7) Ventral premotor cortex &amp; inferior frontal gyrus - left</b> | Sphere with r = 10mm around [-50, 6, 26]                   | 515         | 4120                      |
| (8) Posterior cerebellum - right                                       | posterior cerebellar lobe – according to the WFU PickAtlas | 8636        | 69090                     |
| (9) Gyrus frontalis medius - right                                     | Sphere with r = 10mm around [26, 0, 54]                    | 515         | 4120                      |
| (10) Inferior parietal lobule - right                                  | AAL label “Parietal_Inf_R”                                 | 1345        | 10760                     |
| <b>(11) Posterior inferior temporal cortex - left</b>                  | Sphere with r = 10mm around [-46, -62, -12]                | 515         | 4120                      |
| (12) Putamen - left                                                    | AAL label “Putamen_L”                                      | 1090        | 8720                      |
